# Supplementary material
Source: PubMed Central journal article supplement (PMC3678293)
Supplement: la401025r_si_001.pdf [file la401025r_si_001.pdf]

## Supporting Information

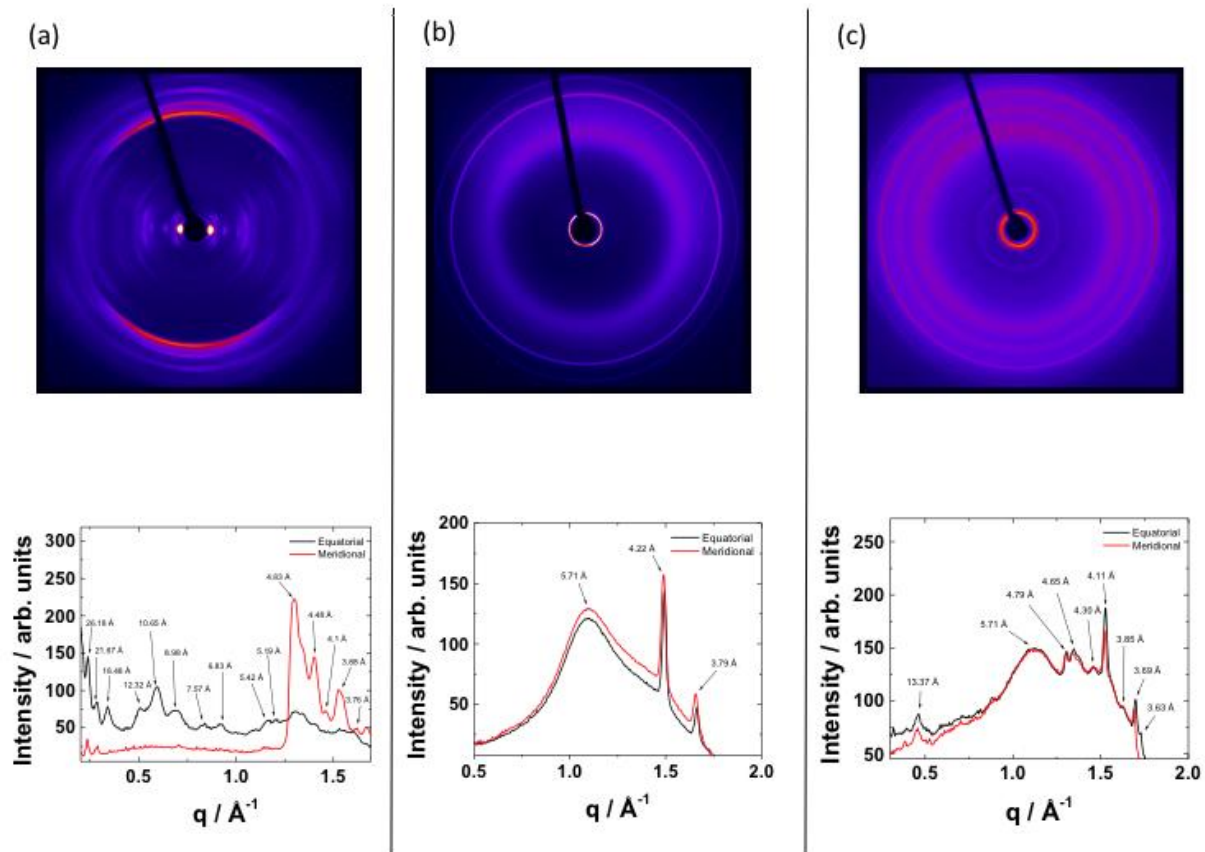

SI Fig. 1. Fibre x-ray diffraction images and radial averages from stalks dried from 1 wt% solutions of (a) C<sub>16</sub>-KKFFVLK, (b) C<sub>16</sub>-KKFF and (c) C<sub>16</sub>-KKF.

**Table 1.** Spacings from X-ray diffraction measurements

| Sample<br>Peaks       | 0.5%<br>C <sub>16</sub> -<br>KKFFVLK | 1%<br>C <sub>16</sub> -<br>KKFFVLK       | 2%<br>C <sub>16</sub> -<br>KKFFVLK       | 0.5%<br>C <sub>16</sub> -<br>KKFF | 1%<br>C <sub>16</sub> -<br>KKFF | 2%<br>C <sub>16</sub> -<br>KKFF | 0.5%<br>C <sub>16</sub> -<br>KKF         | 1%<br>C <sub>16</sub> -<br>KKF           | 2%<br>C <sub>16</sub> -<br>KKF           |
|-----------------------|--------------------------------------|------------------------------------------|------------------------------------------|-----------------------------------|---------------------------------|---------------------------------|------------------------------------------|------------------------------------------|------------------------------------------|
| 35 – 14 Å<br>Spacings |                                      | 34.90,<br>26.18,<br>21.67,<br>18.48,     | 34.90,<br>26.18,<br>21.67,<br>18.48      |                                   |                                 |                                 |                                          |                                          | 23.27                                    |
| 10 – 13 Å<br>Spacings |                                      | 12.32,<br>10.65                          | 12.32,<br>10.65                          |                                   |                                 |                                 | 13.96                                    | 13.37                                    | 13.96,                                   |
| 5 – 9 Å Spacings      |                                      | 8.98,<br>7.57,<br>6.83,<br>5.42,<br>5.19 | 8.98,<br>7.57,<br>6.83,<br>5.42,<br>5.19 |                                   | 5.70<br>(d)                     |                                 |                                          |                                          | 8.98,<br>7.06                            |
| β-strand spacing      | 4.87                                 | 4.83                                     | 4.83                                     |                                   |                                 |                                 | 4.83                                     | 4.83                                     | 4.83                                     |
| 3- 4 Å Spacing        | 4.13<br>3.72                         | 4.48,<br>4.10,<br>3.93,<br>3.76          | 4.48,<br>4.10,<br>3.93,<br>3.76          | 4.55<br>(d)                       | 4.22,<br>3.79                   | 4.39<br>(d)                     | 4.67,<br>4.30,<br>4.08,<br>3.85,<br>3.63 | 4.65,<br>4.30,<br>4.11,<br>3.85,<br>3.69 | 4.62,<br>4.27,<br>4.11,<br>3.88,<br>3.63 |

| Sample<br>Peaks       | 0.5%<br>FVLK    | 1%<br>FVLK      | 1%<br>VLK                  | 2%<br>VLK     |
|-----------------------|-----------------|-----------------|----------------------------|---------------|
| 35 – 14 Å<br>Spacings | 16.11           | 16.11           |                            |               |
| 10 – 13 Å<br>Spacings | 11.64,<br>10.30 | 11.64,<br>10.30 | 10.47                      | 10.47         |
| 5 – 9 Å Spacings      | 5.11            | 5.11            |                            | 5.76 (d)      |
| β-strand spacing      | 4.72            | 4.72            |                            |               |
| 3- 4 Å Spacing        |                 |                 | 4.59 (d),<br>4.19,<br>3.76 | 4.22,<br>3.76 |
